# Supplementary material
Source: publisher site journal article supplement (https://www.dovepress.com/article/583847)
Supplement: Supplementary file 1 [file 583847%20Supplementary%20Tables.docx]

**Supplementary Table S1** Screening results of venetoclax structural model and covariate model

| **No.** | **Description** | **OFV** | **AIC** |
| --- | --- | --- | --- |
| S**tructural model** | |  |  |
| 1 | 1 Compartment model-additive residual | 811.81 | 821.81 |
| **2** | **1 Compartment model-proportional residual** | **636.30** | **646.30** |
| 3 | 1 Compartment model-mixed residual | 640.40 | 654.40 |
| 4 | 2 Compartment mode-additive residual | 809.95 | 826.95 |
| 5 | 2 Compartment model-proportional residual | 632.05 | 646.05 |
| 6 | 2 Compartment model-mixed residual | 717.74 | 733.74 |
| **Covariate model a** | |  |  |
| 7 | TP on V | 621.94 | 633.94 |
| 8 | BSA on CL | 624.50 | 636.50 |
| 9 | Triazole on CL | 621.55 | 633.55 |
| 10 | BSA + Triazole on CL | 599.94 | 613.94 |
| **11** | **TP on V, BSA + Triazole on CL** | **586.88** | **602.88** |

AIC, Akaike information criterion; CL, clearance; TP, total protein; BSA, body surface area; OFV, objective function value.

a, since there were many candidate covariates in this study, the covariates were screened into the stepwise mode according to the scatter plot or box plot of each candidate covariate and random effect (η).

Bold values indicate the selected final model based on the lowest OFV and AIC values.

**Supplementary Table S2** The characteristics of enrolled patients in the external dataset

|  | **Number (%)** | **Mean (SD)** | **Range** |
| --- | --- | --- | --- |
| No. of patients (samples) | 39 (84) |  |  |
| Sex |  |  |  |
| Male | 26 (66.7) |  |  |
| Female | 13 (33.3) |  |  |
| Age (year) |  | 7 (3.9) | 2-18 |
| BSA (m-2) |  | 1.3 (0.4) | 0.5-2.4 |
| TP (g⋅L-1) |  | 65.7 (9.2) | 45.8−81.6 |
| Triazole co-medication |  |  |  |
| With | 21 (53.8) |  |  |
| Not with | 18 (46.2) |  |  |

TP, total protein, BSA, body surface area
